# Supplementary material
Source: publisher figshare collection journal article supplement (https://frontiersin.figshare.com/ndownloader/files/25734143)

**Figure S2**

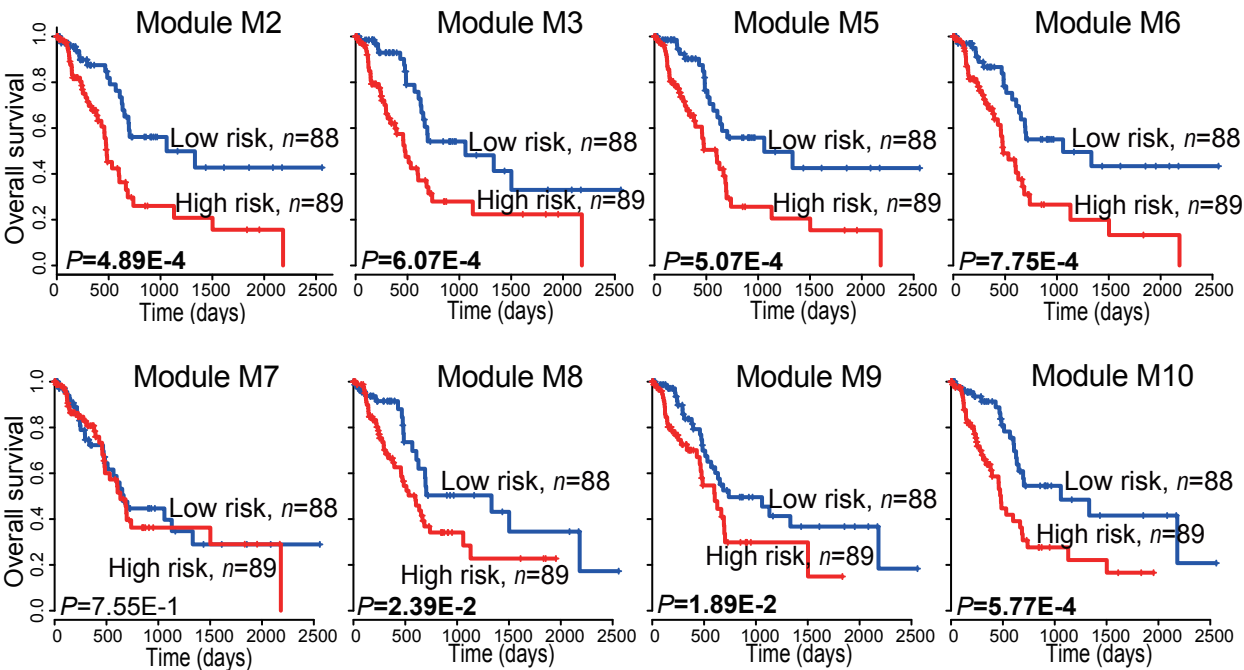

Supplement: Supplementary file [file 25734143]
